# Supplementary figures and images for: La aportación de la Campaña del Enfermo a los obispos españoles y de los obispos de la Campaña
Source: MDPI journal article supplement (doi:10.3390/plants12122365), 2009-01-01

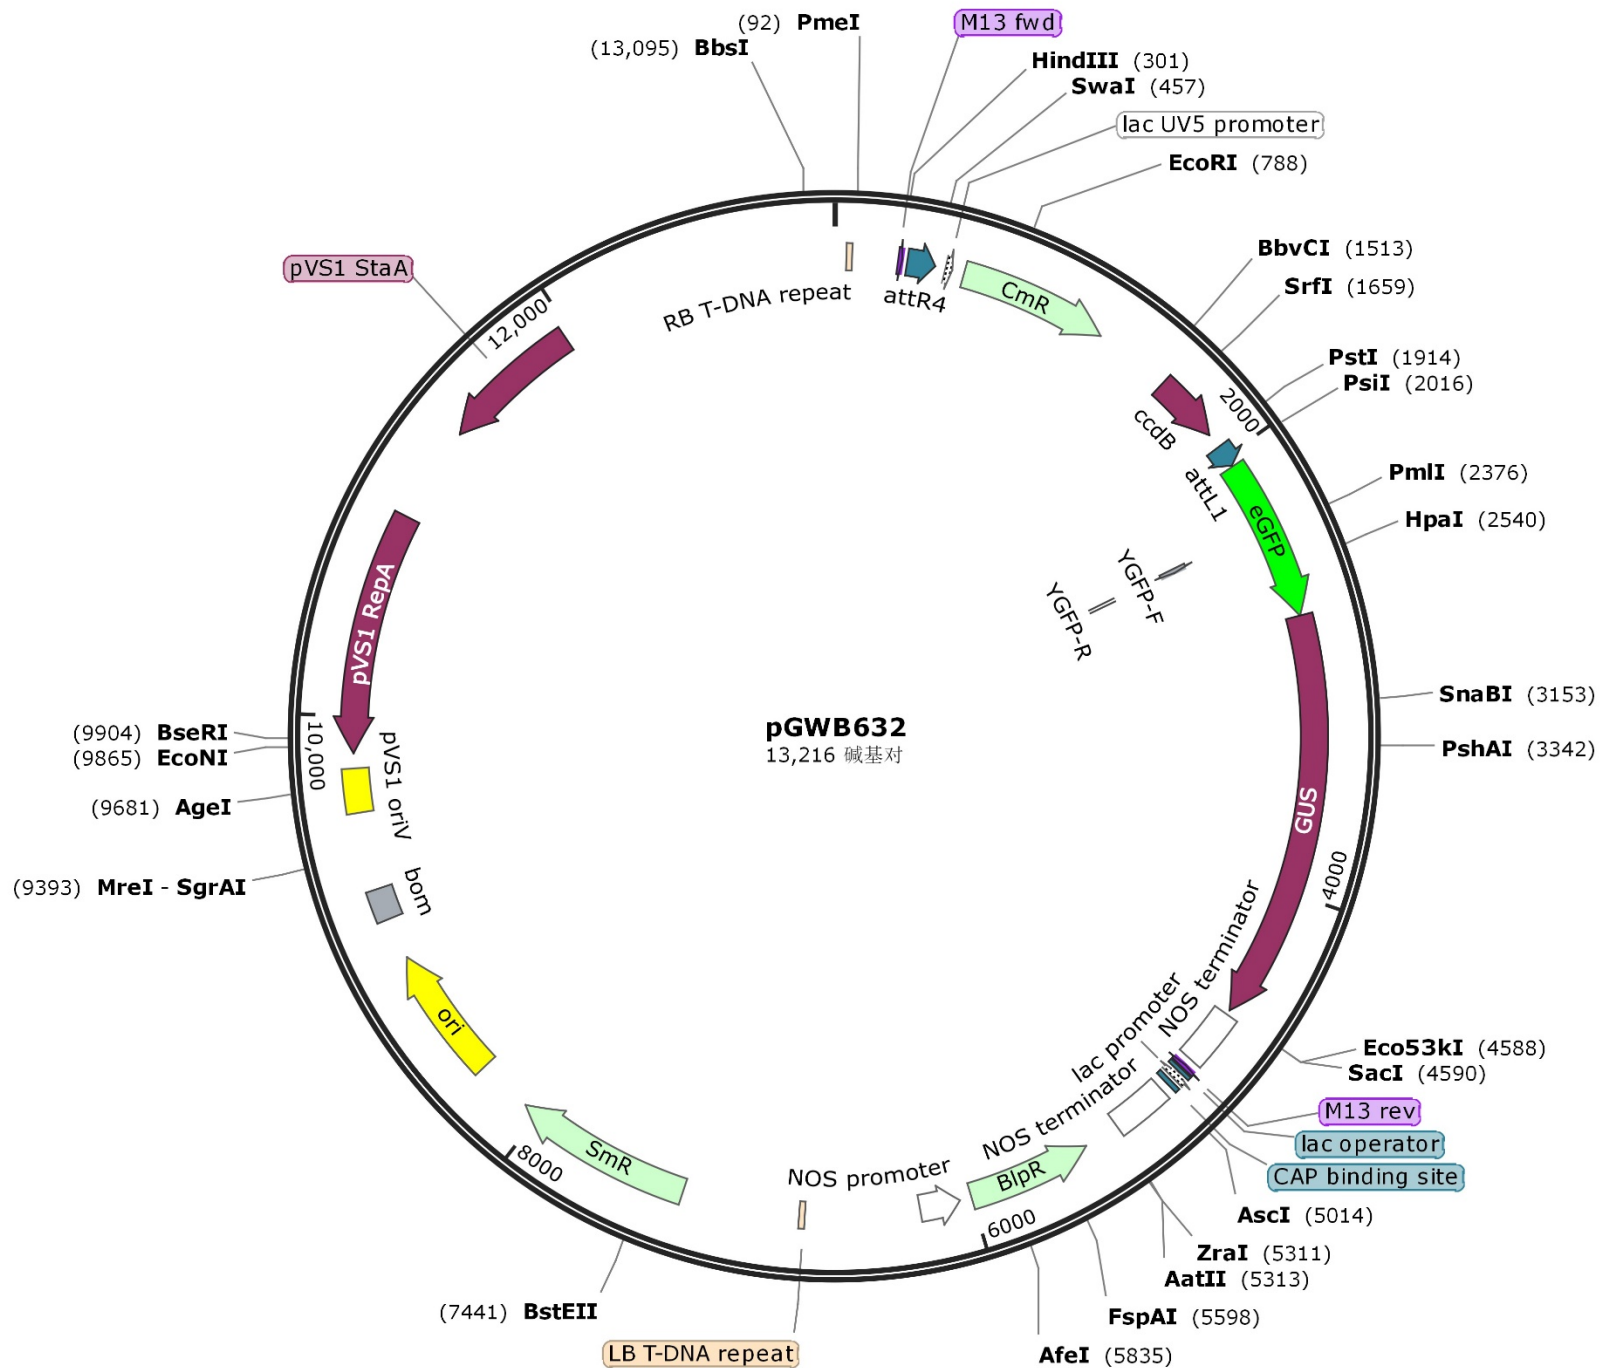

Supplement: s1 [file s1]

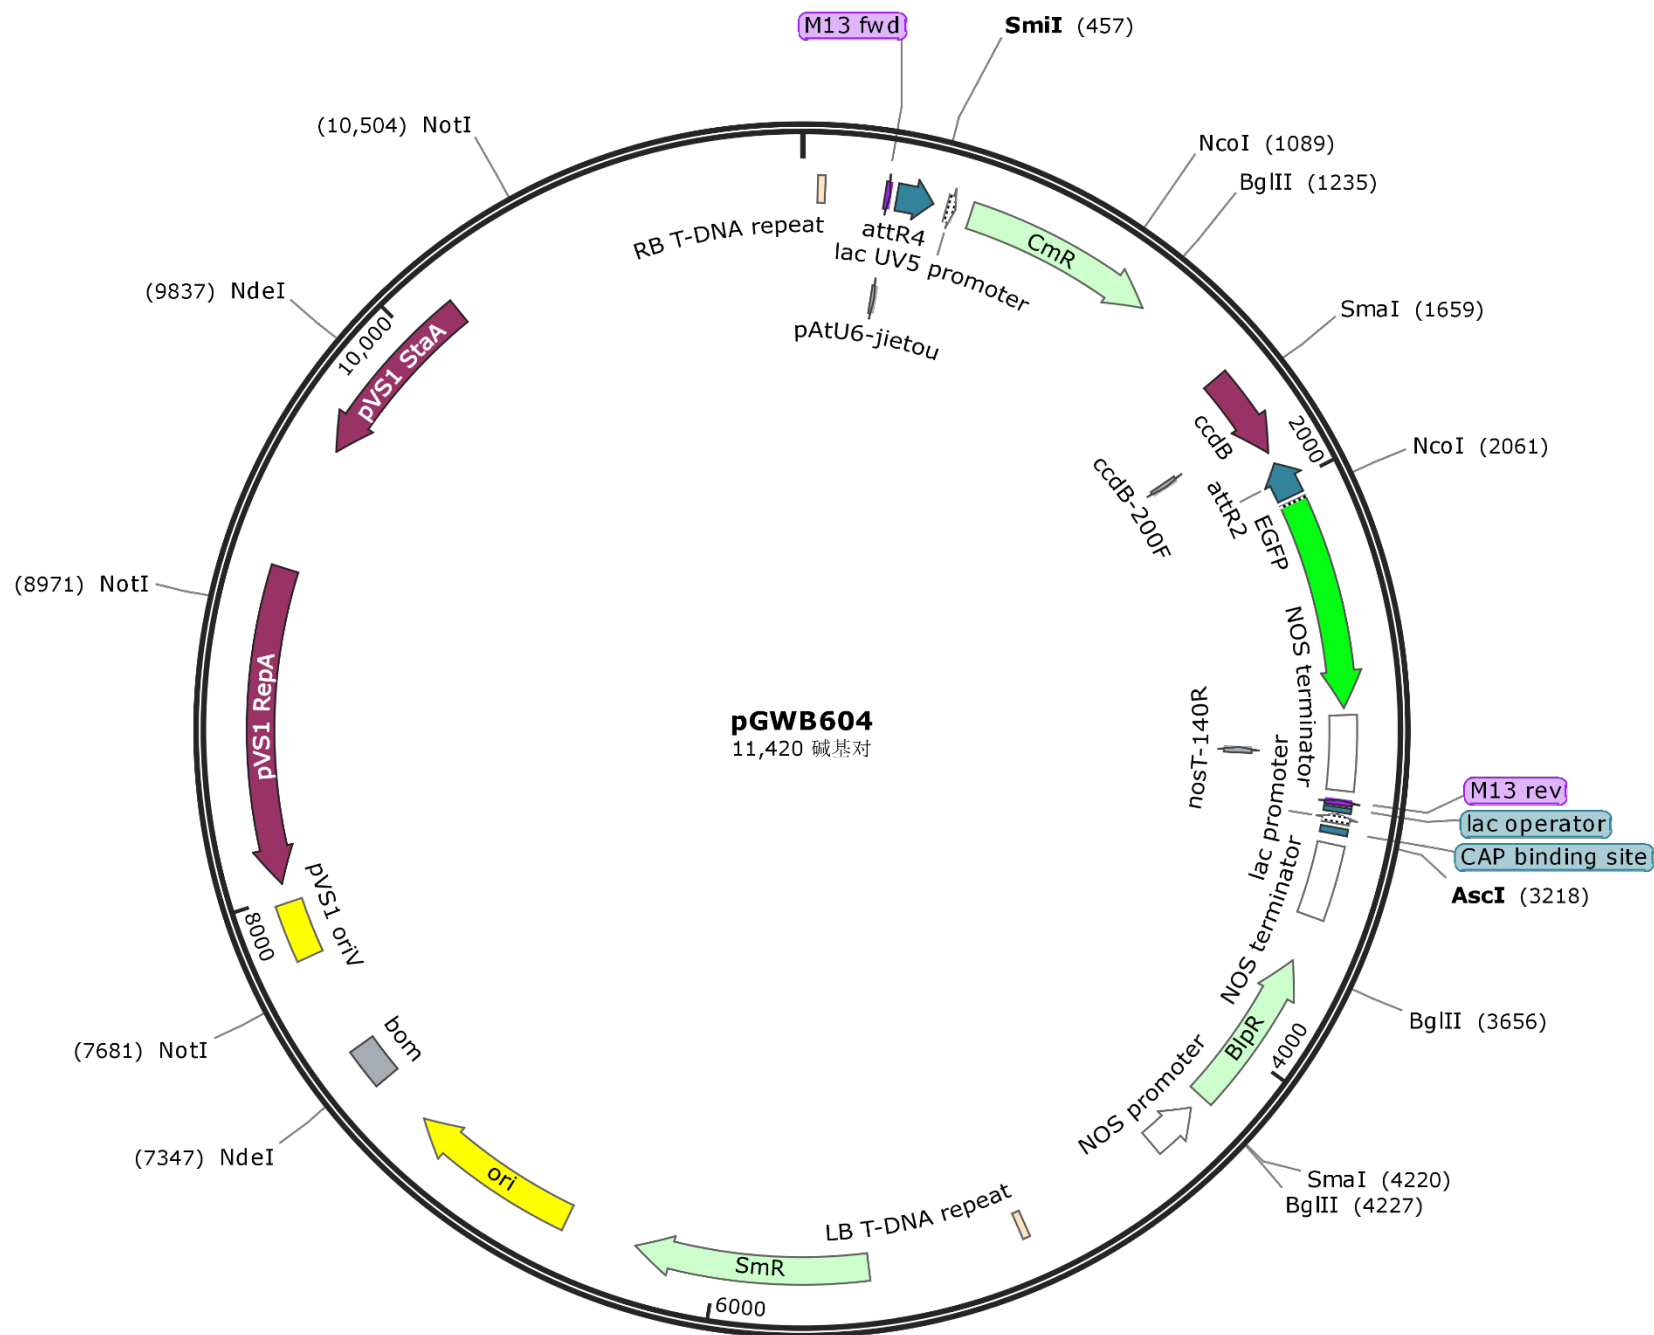

Supplement: s1 [file s1]

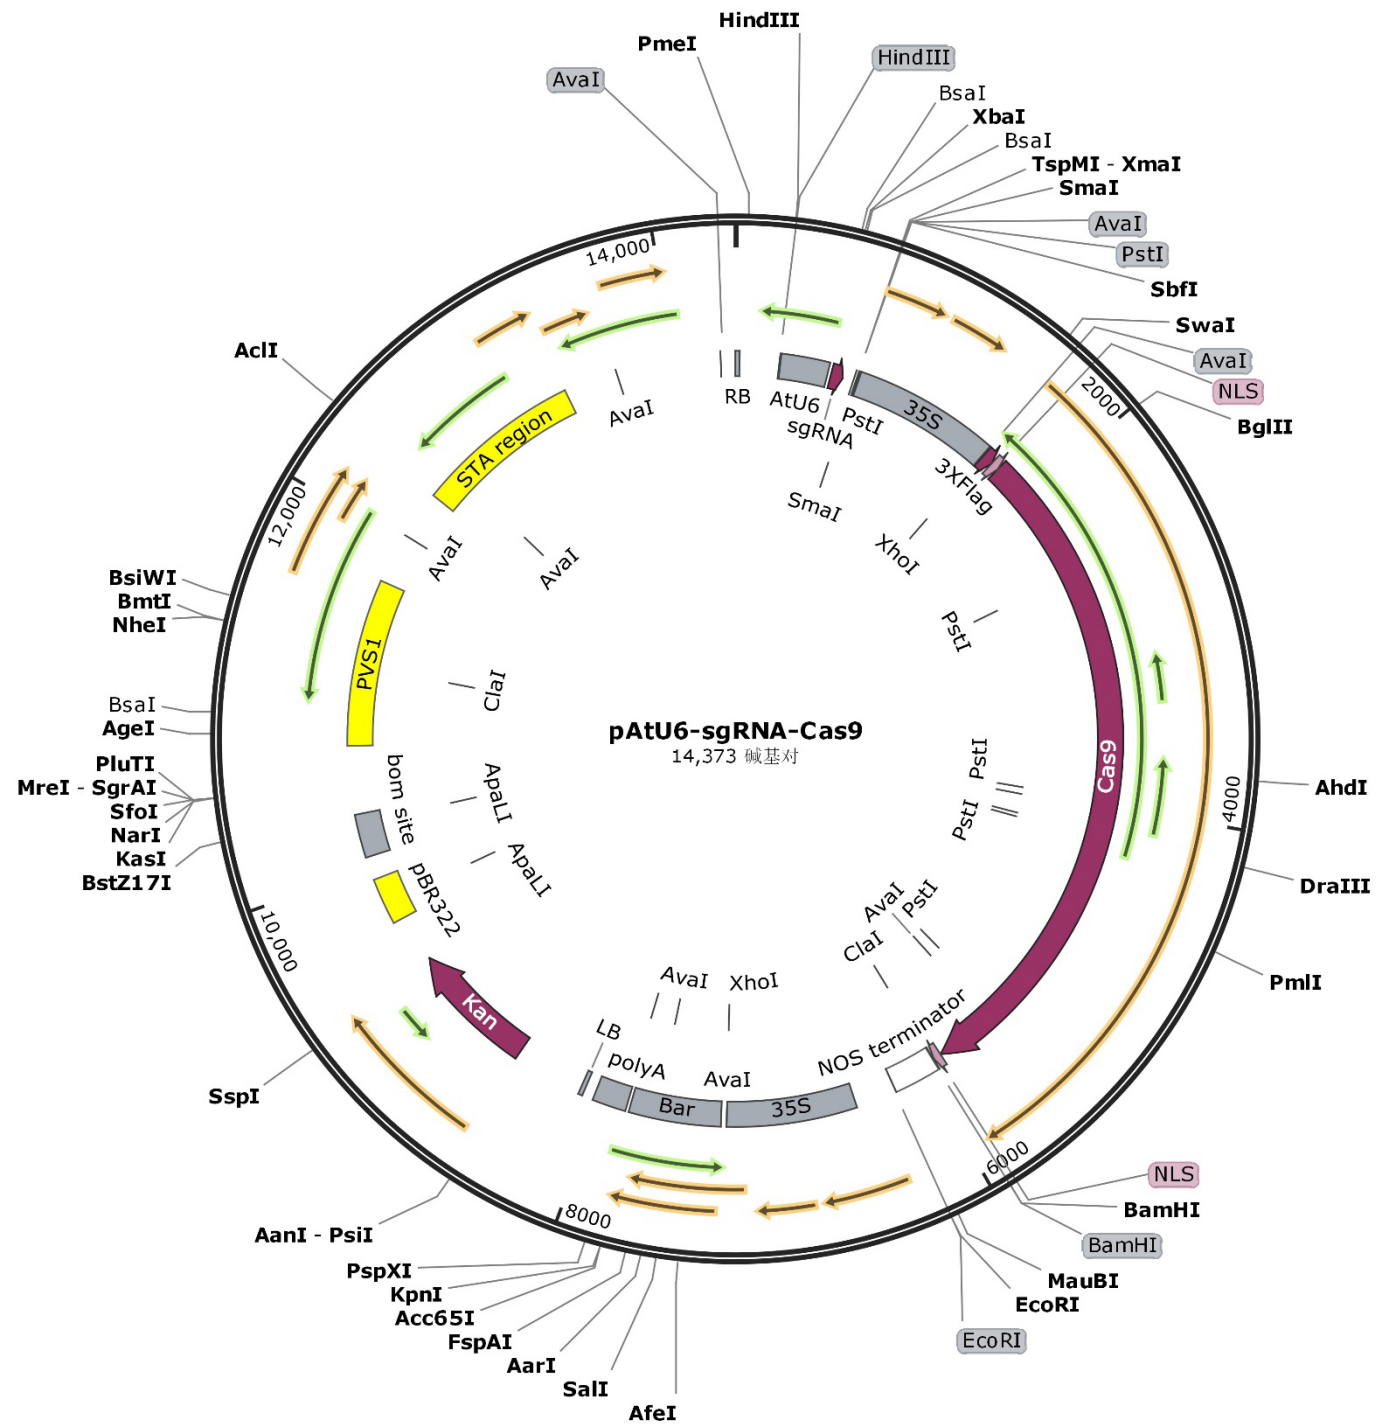

Supplement: s1 [file s1]
